# Supplementary material
Source: publisher figshare collection journal article supplement (https://tandf.figshare.com/articles/dataset/_/5708233)
Supplement: Supplementary file 1 [file 2]

Supplementary Data 2

A new chelydroid turtle, *Lutemys warreni* gen. et sp. nov., from the Late Cretaceous  
(Campanian) Kaiparowits Formation of southern Utah

TYLER R. LYSON,<sup>1,\*</sup> WALTER G. JOYCE,<sup>2</sup> and JOSEPH J. W. SERTICH<sup>1</sup>

<sup>1</sup>Department of Earth Sciences, Denver Museum of Nature and Science, Denver, Colorado

80205, U.S.A., tyler.lyson@dmns.org;

<sup>2</sup>Department of Geosciences, University of Fribourg, 1700 Fribourg, Switzerland,

walter.g.joyce@gmail.com

---

\*Corresponding author.

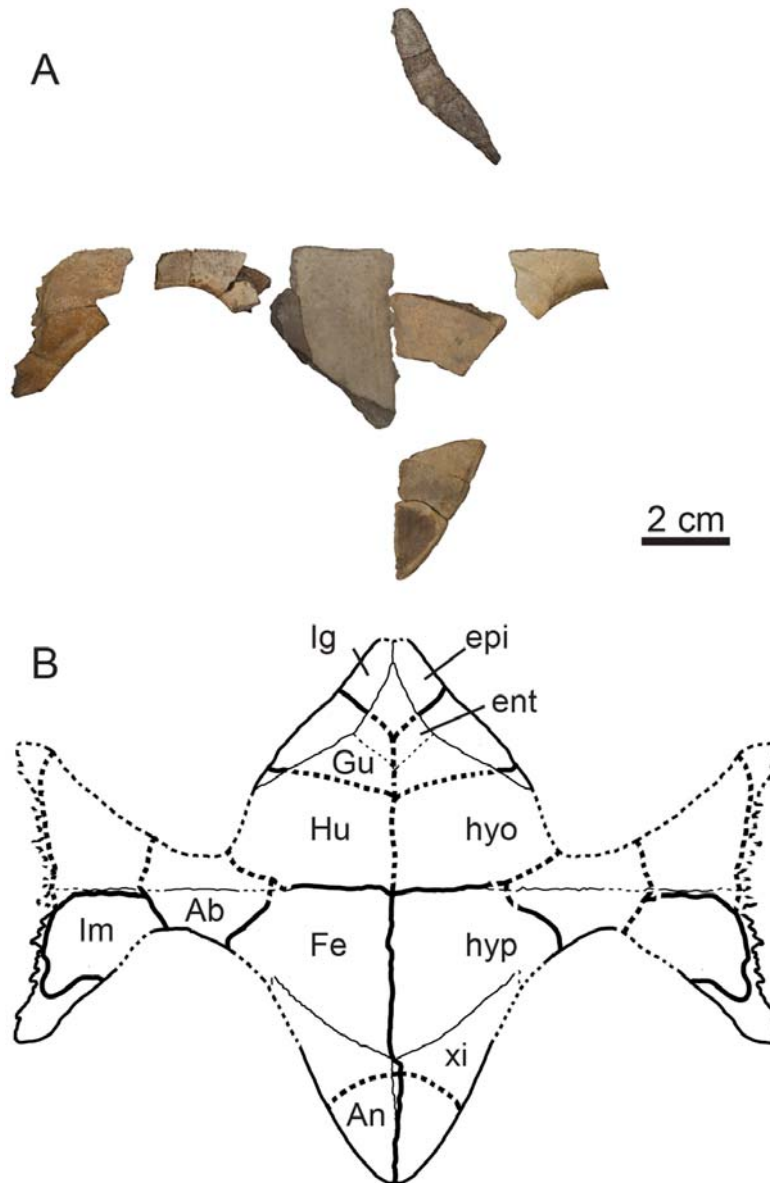

FIGURE S1. *Lutemys warreni*, DMNH EPV.89000, holotype, from the Kaiparowits Formation (upper Campanian) of Grand Staircase-Escalante National Monument, Utah, U.S.A. **A**, photograph and **B**, line drawing of the plastron. **Abbreviations:** **Ab**, abdominal scale; **An**, anal scale; **ent**, entoplastron; **epi**, epiplastron; **Fe**, femoral scale; **Gu**, gular scale; **Hu**, humeral scale; **hyo**, hyoplastron; **hyp**, hypoplastron; **Ig**, intergular scale; **Pe**, pectoral scale; **xi**, xiphiplastron.

## APPENDIX S2

### Strict consensus of 2 trees highlighting numeration of clades

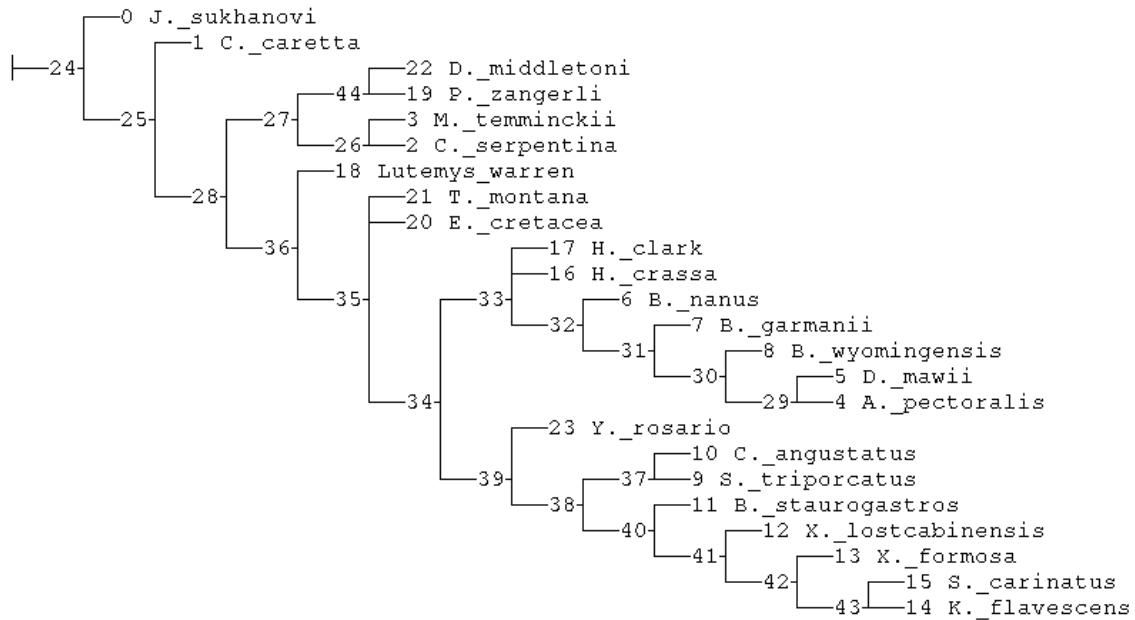

### Synapomorphies common to 2 trees

Node numbers refer to nodes in consensus above. Note that character number starts at 0 in TNT, not at 1.

#### *Judithemys sukhanovi* :

All trees:

No autapomorphies:

#### *Caretta caretta* :

All trees:

Char. 28: 2 --> 3

Char. 53: 0 --> 1

Char. 64: 1 --> 0

#### *Chelydra serpentina* :

All trees:

Char. 1: 0 --> 2

Char. 21: 4 --> 5

Char. 24: 1 --> 2

Char. 25: 1 --> 0

*Macrochelys temminckii* :

All trees:

Char. 11: 0 --> 1

Char. 12: 0 --> 1

Char. 13: 0 --> 1

Char. 40: 0 --> 1

Char. 52: 1 --> 0

*Agomphus pectoralis* :

All trees:

Char. 3: 2 --> 3

Char. 7: 0 --> 1

Char. 27: 1 --> 0

*Dermatemys mawii* :

All trees:

Char. 9: 01 --> 2

Char. 19: 0 --> 2

Char. 24: 1 --> 0

Char. 25: 2 --> 1

Char. 28: 2 --> 3

Char. 46: 1 --> 0

Char. 64: 1 --> 0

*Baptemys nanus* :

All trees:

Char. 55: 0 --> 1

*Baptemys garmanii* :

All trees:

No autapomorphies:

*Baptemys wyomingensis* :

All trees:

Char. 19: 0 --> 1

*Staurotypus triporcatus* :

All trees:

Char. 0: 0 --> 3

Char. 1: 0 --> 2

Char. 6: 0 --> 1

*Claudius angustatus* :

All trees:

Char. 18: 0 --> 1

Char. 47: 2 --> 0

*Baltemys staurogastros* :

All trees:

No autapomorphies:

*Xenochelys lostcabinensis* :

All trees:

No autapomorphies:

*Xenochelys formosa* :

All trees:

Char. 60: 1 --> 0

*Kinosternon flavescens* :

All trees:

Char. 33: 1 --> 2

*Sternotherus carinatus* :

All trees:

Char. 63: 1 --> 0

*Hoplochelys crassa* :

All trees:

No autapomorphies:

*Hoplochelys clark* :

All trees:

Char. 2: 1 --> 0

Char. 11: 0 --> 1

*Lutemys warren* :

All trees:

Char. 48: 0 --> 1

Char. 56: 0 --> 1

*Protochelydra zangerli* :

All trees:

No autapomorphies:

*Emarginachelys cretacea* :

All trees:

Char. 48: 0 --> 1

*Tullochelys montana* :

Some trees:

Char. 24: 1 --> 0

*Denverus middletoni* :

All trees:

Char. 1: 0 --> 12

*Yelmochelys rosarioae* :

All trees:

Char. 19: 0 --> 1

Char. 28: 1 --> 2

Node 25 :

All trees:

No synapomorphies

Node 26 :

All trees:

Char. 17: 2 --> 0

Char. 21: 23 --> 4

Char. 33: 0 --> 1

Char. 53: 0 --> 1

Node 27 :

All trees:

Char. 22: 8 --> 7



Char. 36: 1 --> 0

Node 28 :

All trees:

Char. 3: 3 --> 1

Char. 27: 0 --> 1

Char. 28: 2 --> 1

Char. 29: 0 --> 1

Node 29 :

All trees:

Char. 1: 1 --> 0

Char. 26: 0 --> 1

Char. 59: 0 --> 1

Node 30 :

All trees:

Char. 0: 2 --> 0

Node 31 :

All trees:

Char. 1: 2 --> 1

Node 32 :

All trees:

Char. 20: 1 --> 2

Char. 28: 1 --> 2

Char. 29: 1 --> 0

Char. 49: 0 --> 1

Node 33 :

All trees:

Char. 0: 0 --> 2

Char. 1: 0 --> 2

Node 34 :

All trees:

Char. 25: 1 --> 2

Char. 26: 1 --> 0

Char. 39: 0 --> 1

Char. 45: 0 --> 1

Some trees:

Char. 51: 0 --> 1

Node 35 :

All trees:

Char. 46: 0 --> 1

Char. 52: 1 --> 0

Some trees:

Char. 61: 0 --> 1

Char. 62: 0 --> 1

Char. 63: 0 --> 1

Node 36 :

All trees:

Char. 43: 0 --> 1

Char. 44: 0 --> 2

Node 37 :

All trees:

Char. 30: 0 --> 1

Char. 32: 0 --> 1

Node 38 :

All trees:

Char. 15: 0 --> 12

Char. 28: 1 --> 0

Char. 46: 1 --> 0

Node 39 :

All trees:

Char. 16: 0 --> 1

Char. 21: 3 --> 4

Char. 22: 8 --> 7

Char. 24: 1 --> 2

Node 40 :

All trees:

Char. 4: 0 --> 1

Char. 5: 0 --> 1

Char. 9: 1 --> 2

Char. 11: 0 --> 1

Node 41 :

All trees:

Char. 18: 0 --> 1

Char. 19: 0 --> 2

Char. 26: 0 --> 1

Char. 31: 0 --> 1

Node 42 :

All trees:

Char. 13: 0 --> 1

Node 43 :

All trees:

Char. 4: 1 --> 0

Char. 7: 1 --> 0

Char. 23: 0 --> 1

Char. 51: 1 --> 0

Node 44 :

All trees:

Char. 48: 0 --> 1
